# Supplementary material
Source: Springer Nature journal article supplement (https://www.springermedizin.de/resource/supplementary/12936_2008_718_MOESM4_ESM.pdf/9548084)

# C10

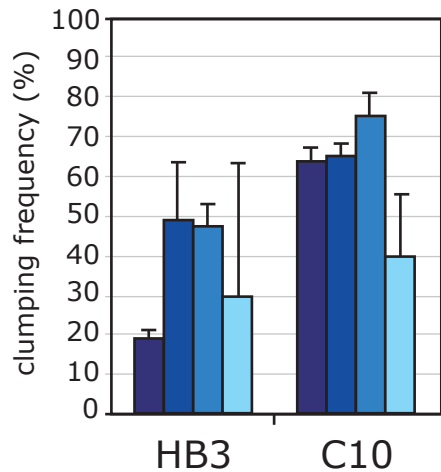

# 3D7

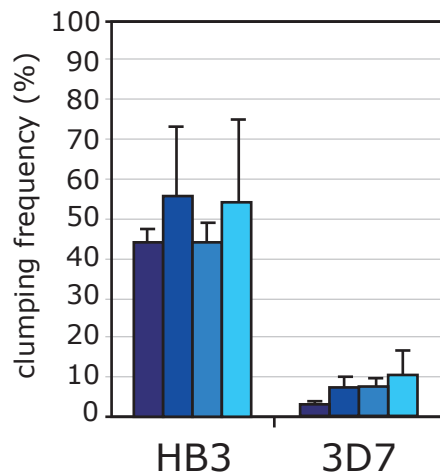

# Dd2

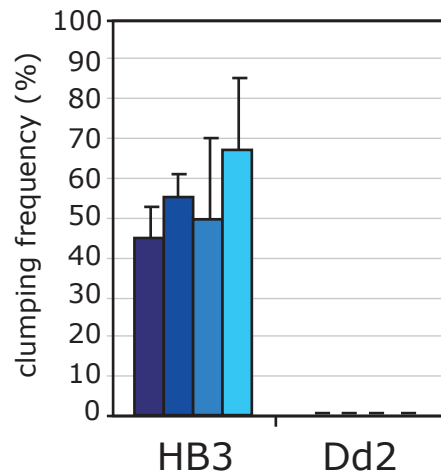

15 min 30 min 1 h 2 h

Supplement: MOESM4 [file 9548084]
